# Supplementary material for: Intermedin attenuates renal fibrosis by induction of heme oxygenase-1 in rats with unilateral ureteral obstruction
Source: Springer Nature journal article supplement (doi:10.1186/s12882-017-0659-6), 2017-07-11

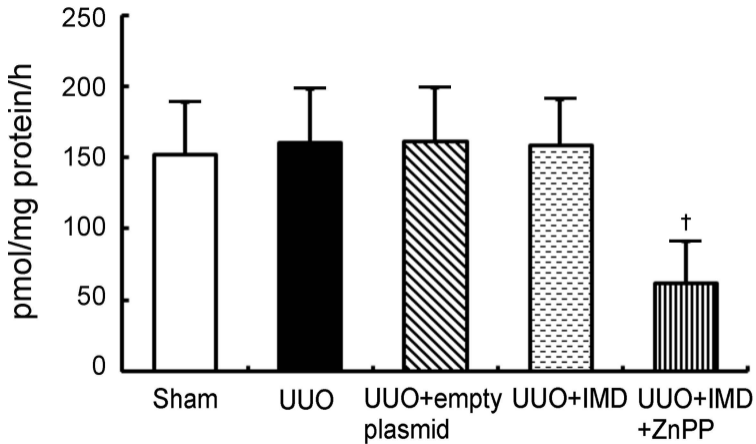

Supplement: MOESM1 [file 13295254]
